# Supplementary material for: Metabolomic approaches to explore chemodiversity in seeds of guaraná (Paullinia cupana) using UPLC-QTOF-MSE and NMR analysis
Source: Royal Society of Chemistry journal article supplement (doi:10.1039/d3ay01737k), 2023-12-26
Supplement: d3ay01737k1.pdf [file d3ay01737k1.pdf]

**Electronic supplementary information (ESI)**

**Metabolomic approaches to explore chemodiversity in seeds of guaraná (*Paullinia cupana*) using UPLC-QTOF-MS<sup>E</sup> and NMR analysis**

*Tamyris de Aquino Gondim,<sup>a</sup> Jhonyson Arruda Carvalho Guedes,<sup>ab</sup> Elenilson de Godoy Alves Filho,<sup>c</sup> Gisele Silvestre da Silva,<sup>b</sup> Natasha Veruska dos Santos Nina,<sup>d</sup> Firmino José do Nascimento Filho,<sup>e</sup> André Luiz Atroch,<sup>e</sup> Gilvan Ferreira Da Silva,<sup>e</sup> Gisele Simone Lopes<sup>a</sup> and Guilherme Julião Zocolo<sup>b\*</sup>*

*<sup>a</sup> Department of Analytical Chemistry and Physical Chemistry, Federal University of Ceará. Av. Humberto Monte, s/n<sup>o</sup> - Campus do Pici, CEP 60440-900, Fortaleza, CE, Brazil.*

*<sup>b</sup> Embrapa Agroindústria Tropical. Rua Dra. Sara Mesquita, 2270 - Pici, CEP 60020-181, Fortaleza, CE, Brazil.*

*<sup>c</sup> Department of Food Engineering, Federal University of Ceará. Av. Humberto Monte, s/n<sup>o</sup> - Campus do Pici, CEP 60440-900, Fortaleza, CE, Brazil.*

*<sup>d</sup> Programa de Pós-graduação em Agronomia Tropical, Universidade Federal do Amazonas. Av. General Rodrigo Octavio Jordão Ramos, 1200 - Coroado I, CEP 69067-005, Manaus, AM, Brazil.*

*<sup>e</sup> Embrapa Amazônia Ocidental. Rodovia AM-010, Km 29, s/n - Zona Rural, CEP 69010-970, Manaus, AM, Brazil.*

\* Corresponding author: [guilherme.zocolo@embrapa.br](mailto:guilherme.zocolo@embrapa.br)

(ORCID 0000-0001-8835-0184)

**Representative 1D and 2D NMR spectra of guaraná seeds, highlighting the resonance signals of catechin, gallic acid and caffeine**

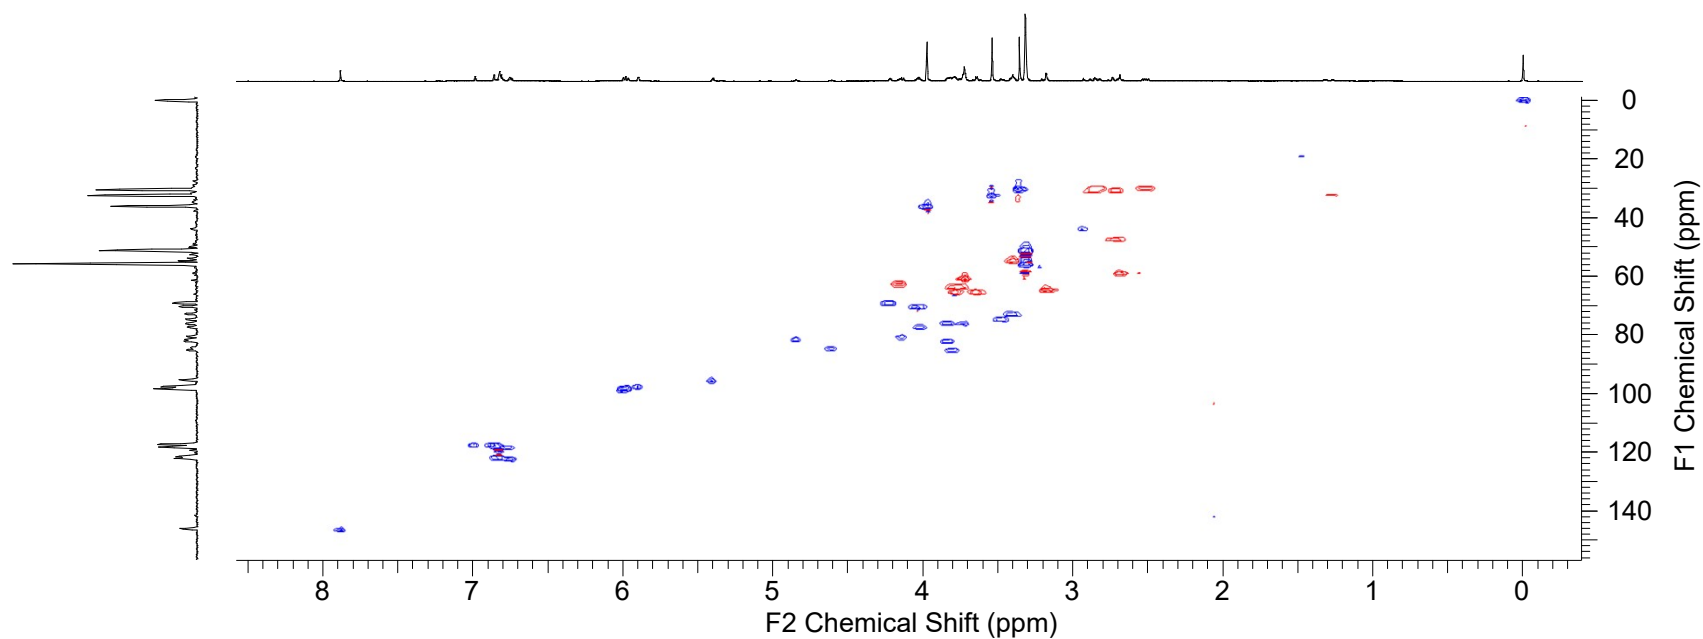

| Parameter              | Value                                                       |
|------------------------|-------------------------------------------------------------|
| Acquisition time (sec) | (0.1500, 0.0066)                                            |
| Frequency (MHz)        | (599.56, 150.76)                                            |
| Nucleus                | ( <sup>1</sup> H, <sup>13</sup> C)                          |
| Number of transients   | 32                                                          |
| Original points count  | (1442, 200)                                                 |
| Points count           | (2048, 1024)                                                |
| Pulse sequence         | gHSQCAD                                                     |
| Solvent                | CD <sub>3</sub> OD- <i>d</i> <sub>4</sub> +D <sub>2</sub> O |
| Spectrum type          | HSQC                                                        |
| Sweep width (Hz)       | (9610.69, 30125.10)                                         |

**Fig. S1** <sup>1</sup>H-<sup>13</sup>C HSQC contour maps (600/150 MHz, CD<sub>3</sub>OD-*d*<sub>4</sub> +D<sub>2</sub>O + EDTA) of guaraná seeds.

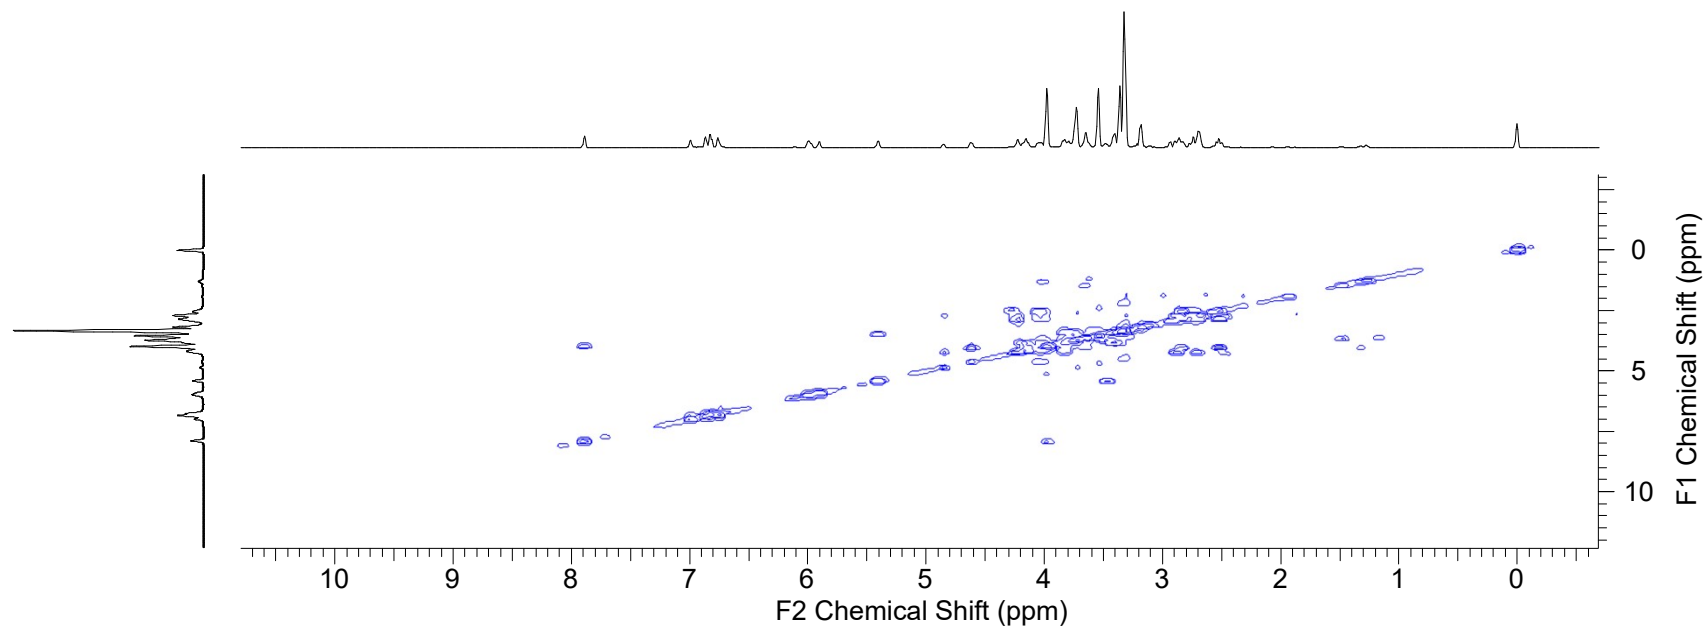

| Parameter              | Value                                                       |
|------------------------|-------------------------------------------------------------|
| Acquisition time (sec) | (0.1500, 0.0208)                                            |
| Frequency (MHz)        | (599.56, 599.56)                                            |
| Nucleus                | ( <sup>1</sup> H, <sup>1</sup> H)                           |
| Number of transients   | 16                                                          |
| Original points count  | (1442, 200)                                                 |
| Points count           | (2048, 2048)                                                |
| Pulse sequence         | gCOSY                                                       |
| Solvent                | CD <sub>3</sub> OD- <i>d</i> <sub>4</sub> +D <sub>2</sub> O |
| Spectrum type          | COSY                                                        |
| Sweep width (Hz)       | (9610.69, 9610.69)                                          |

**Fig. S2** <sup>1</sup>H-<sup>1</sup>H COSY contour maps (CD<sub>3</sub>OD-*d*<sub>4</sub> +D<sub>2</sub>O + EDTA) of guaraná seeds.

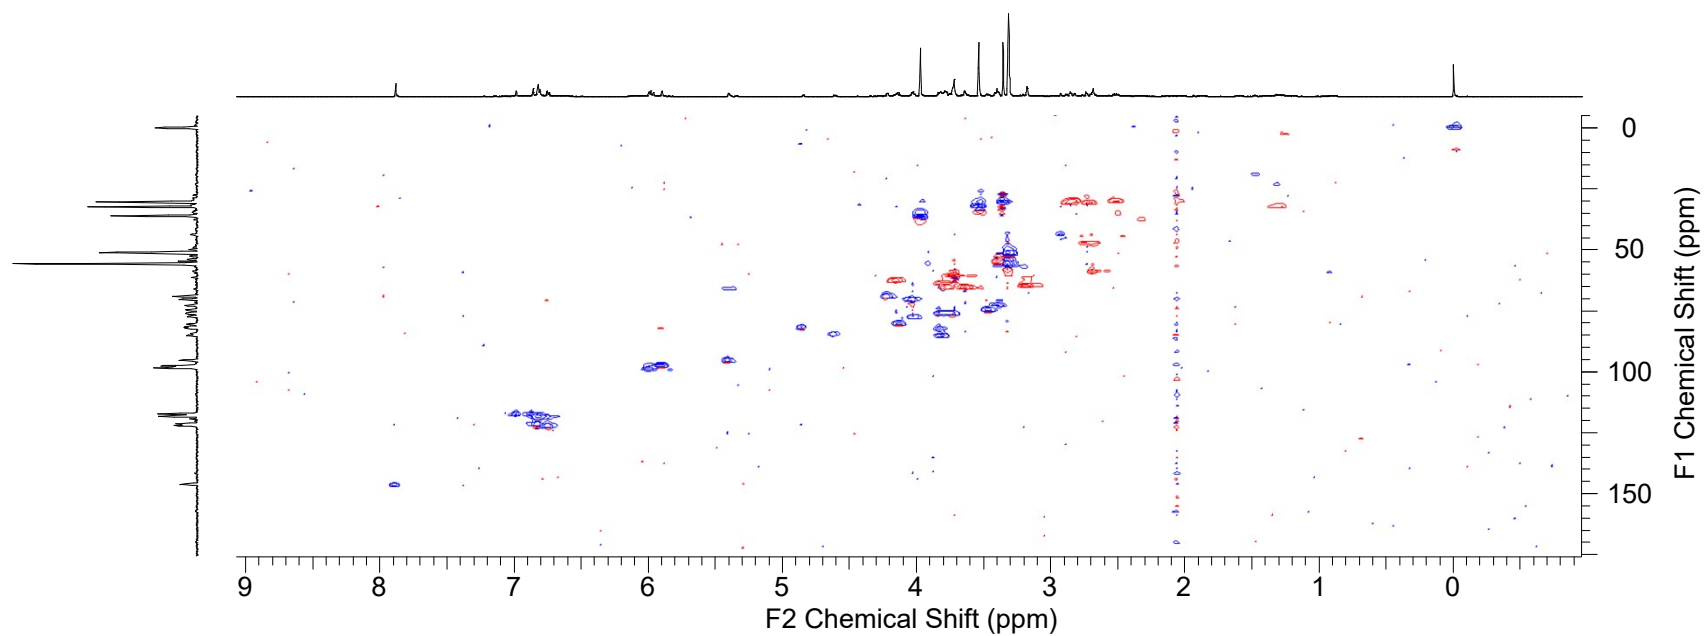

| Parameter              | Value                                                        |
|------------------------|--------------------------------------------------------------|
| Acquisition time (sec) | (0.1500, 0.0066)                                             |
| Frequency (MHz)        | (599.56, 150.76)                                             |
| Nucleus                | ( <sup>1</sup> H, <sup>13</sup> C)                           |
| Number of transients   | 32                                                           |
| Original points count  | (1442, 200)                                                  |
| Points count           | (2048, 1024)                                                 |
| Pulse sequence         | gHSQCAD                                                      |
| Solvent                | CD <sub>3</sub> OD- <i>d</i> <sub>4</sub> + D <sub>2</sub> O |
| Spectrum type          | HSQC                                                         |
| Sweep width (Hz)       | (9610.69, 30125.10)                                          |

**Fig. S3** <sup>1</sup>H-<sup>13</sup>C HMBC contour maps (600/150 MHz, CD<sub>3</sub>OD-*d*<sub>4</sub> + D<sub>2</sub>O + EDTA) of guaraná seeds.

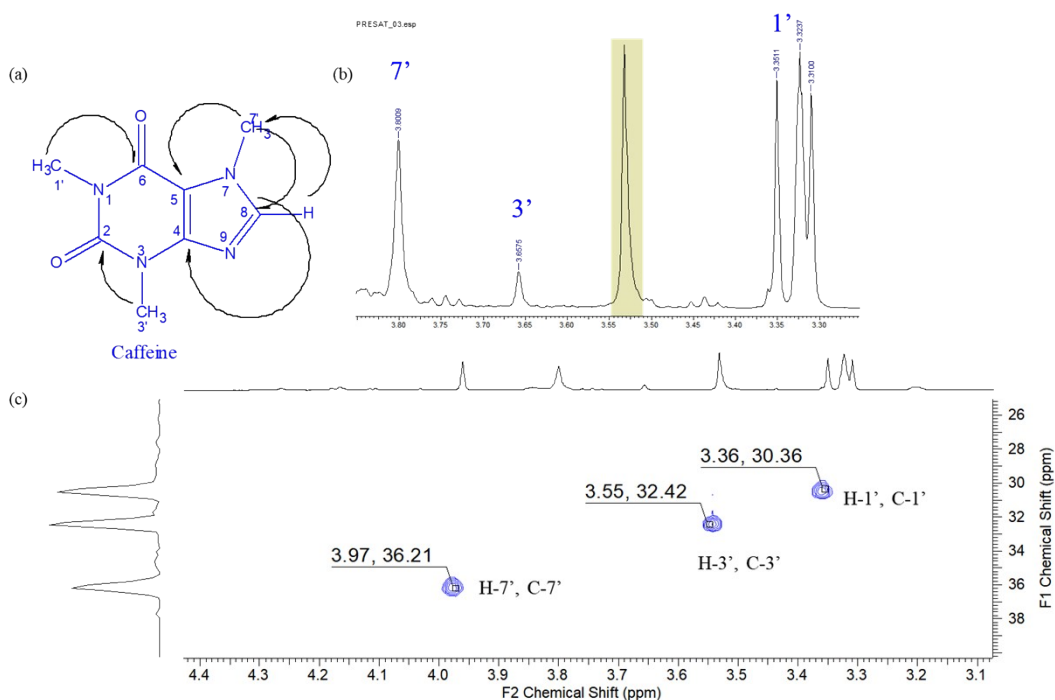

**Fig. S4** (a) Caffeine molecule - arrows indicate the Key HMBC correlations ( $\text{H} \rightarrow \text{C}$ ) observed in a representative sample of guaraná seeds, (b) expansion of PRESAT  $^1\text{H}$  NMR spectrum ( $\delta$  3.30 to 3.90 ppm) and (c) Expansion of  $^1\text{H}$ - $^{13}\text{C}$  HSQC contour map selected region ( $\delta$  3.1 to 4.4 ppm).

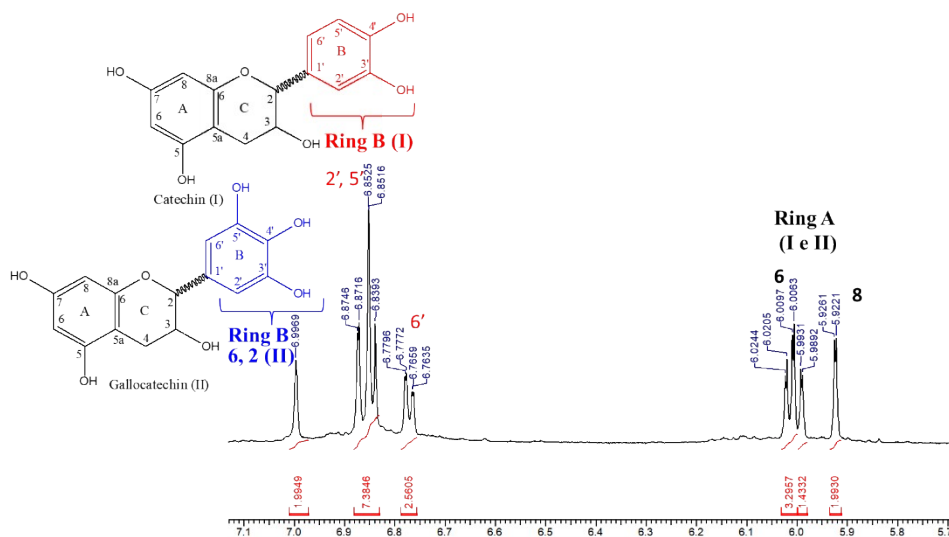

**Fig. S5** Expansion of the representative  $^1\text{H}$  NMR spectrum ( $\delta$  5.70 to 7.10 ppm) highlighting catechin and galocatechin A and B-ring signals.

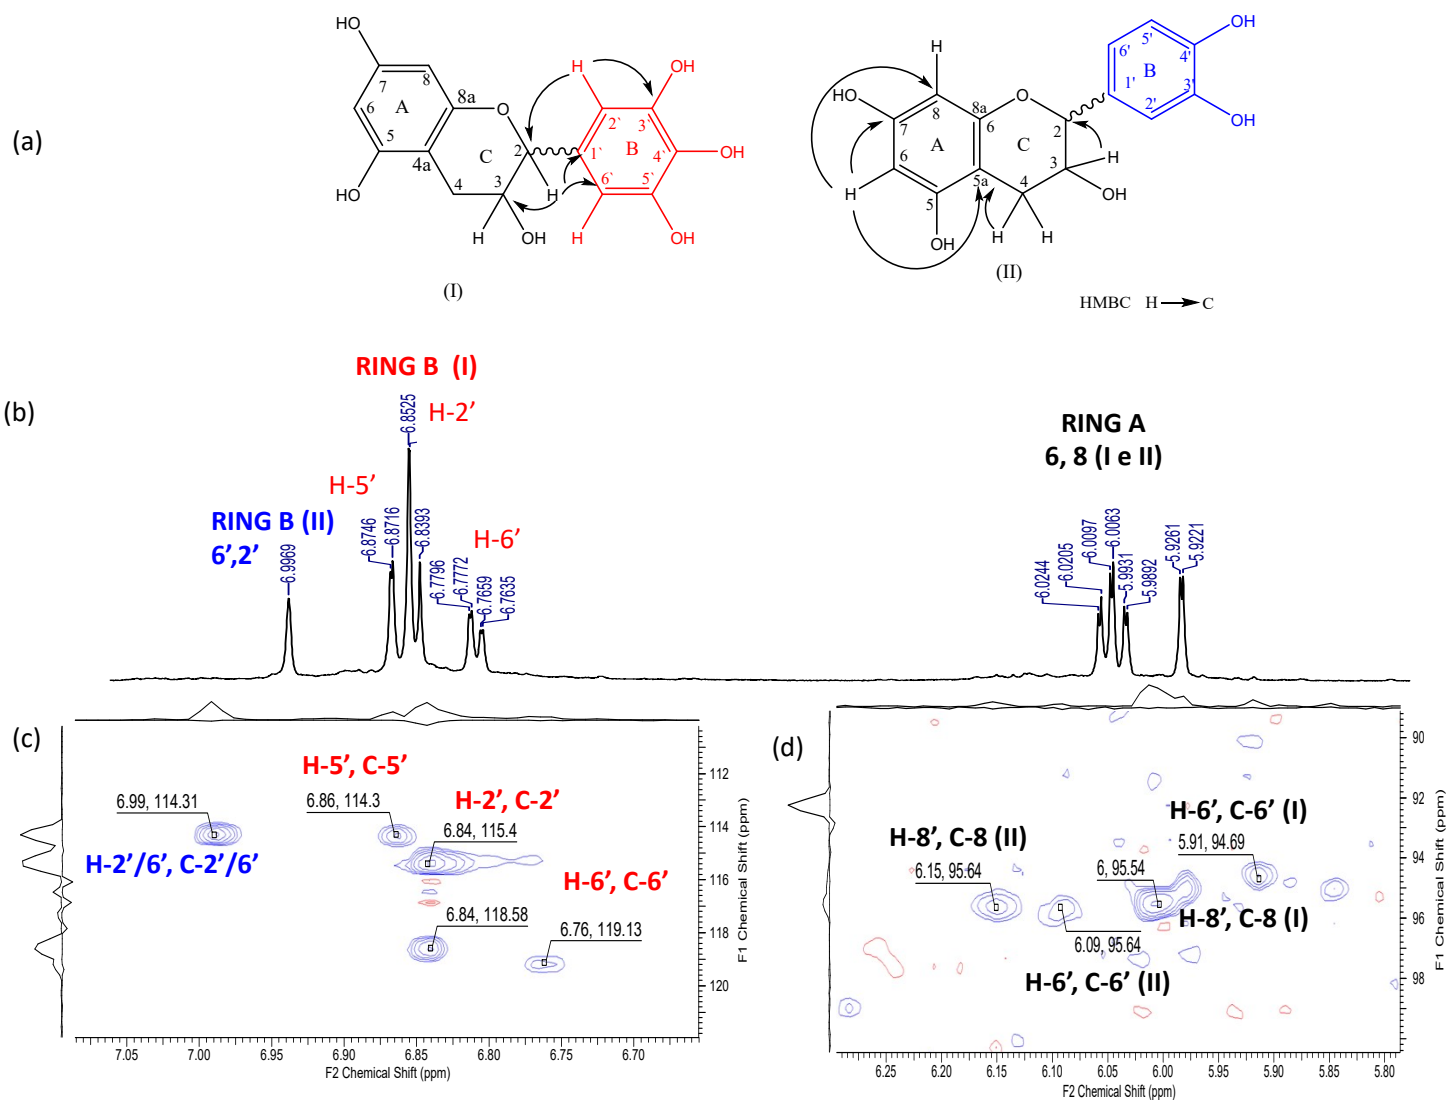

**Fig. S6** (a) Numbered catechin and gallocatechin structure - arrows indicate the Key HMBC correlations observed in a representative sample, (b)  $^1\text{H}$  NMR spectrum expansion ( $\delta$  5.70 to 7.10 ppm) and  $^1\text{H}$ - $^{13}\text{C}$  HSQC heteronuclear correlation map in the region at  $\delta$  5.80 – 6.30 and 6.60 – 7.10 ppm regions (c and d, respectively). In the quantification step, the signals in ring B  $\delta$  6.86 and 6.99 ppm for I and II, respectively, were considered.

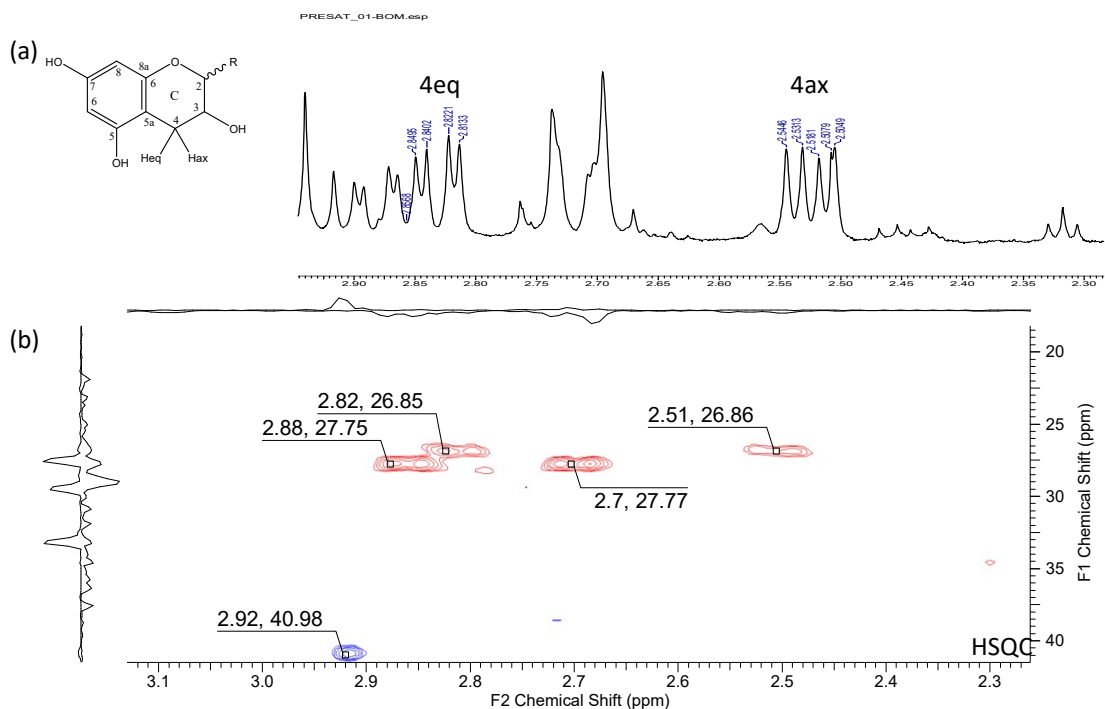

**Fig. S7** Expansion of the representative  $^1\text{H}$ - $^{13}\text{C}$  HSQC contour map of guaraná seeds ( $\delta$  2.1 – 3.1 ppm) highlighting the equatorial (eq) and axial (ax) signals of I and II (C ring).

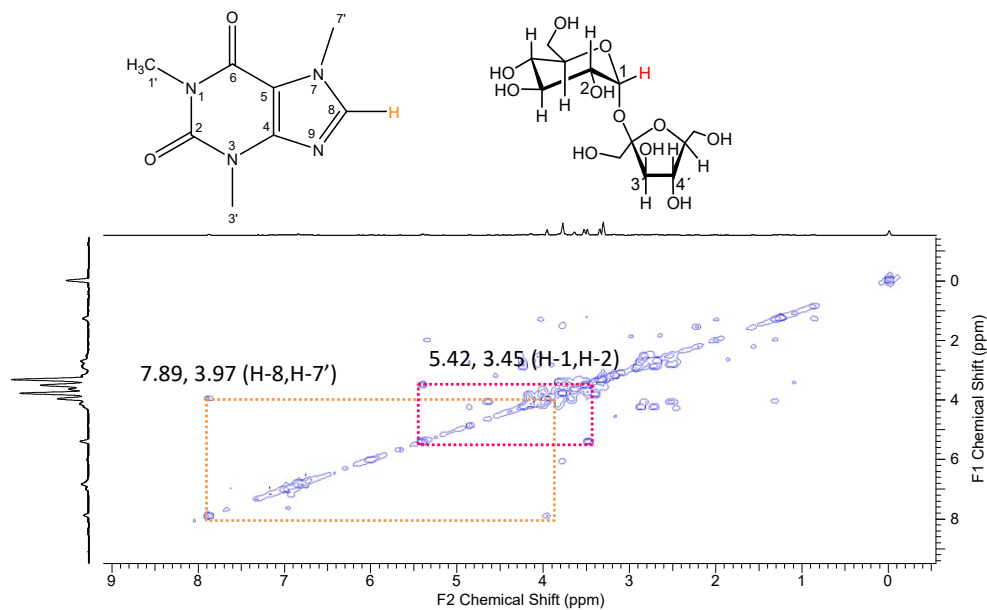

**Fig. S8** A representative  $^1\text{H}$ - $^1\text{H}$  COSY contour map of guaraná seeds highlighting specific correlations between caffeine (H-8 and H-7') and sucrose (H-1 and H-2) protons.
